# Supplementary figures and images for: Highly selective oxidation of methanol to dimethoxymethane over SO42−/V2O5–ZrO2
Source: Royal Society of Chemistry journal article supplement (doi:10.1039/c7nj01295k), 2017-01-01

### Supporting information

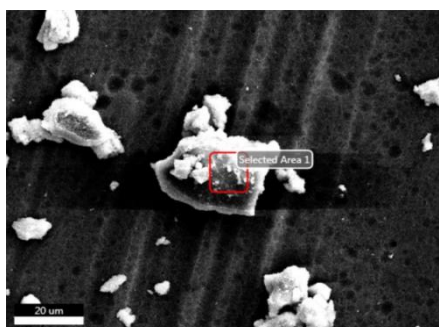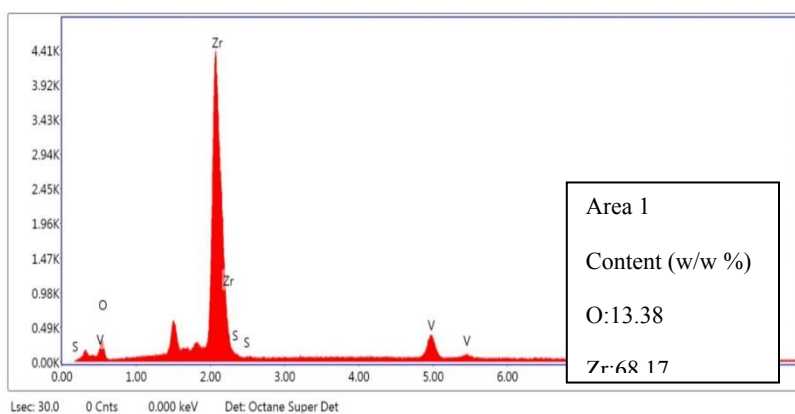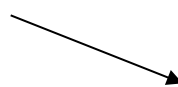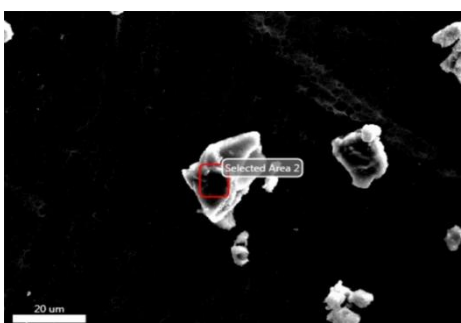

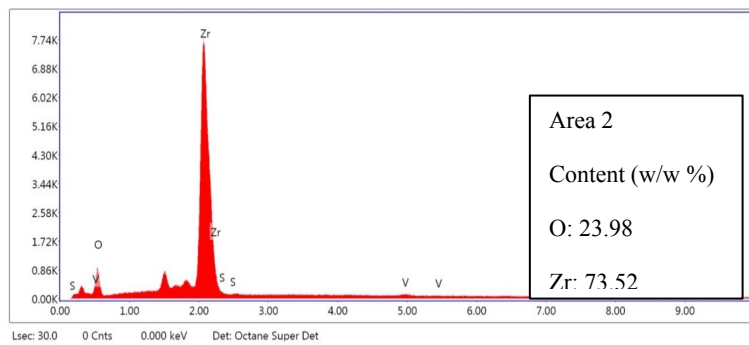

Fig.S11 EDS spectra of ZrVS-500

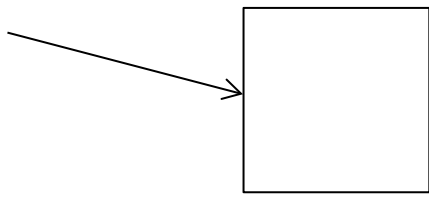

Supplement: c7nj01295k1.pdf [file c7nj01295k1.pdf]
